# Supplementary material for: Defining new criteria for selection of cell-based intestinal models using publicly available databases
Source: PubMed Central journal article supplement (PMC3412164; doi:10.1186/1471-2164-13-274), 2012-06-22
Supplement: 1471-2164-13-274-S5.pdf [file 1471-2164-13-274-S5.pdf]

**Table 1S: List of expression files used for microarray analysis and corresponding accession numbers at Gene Expression Omnibus.**

| Sample Nr. | Chip Names                   | GSE Reference | Sample Names | Names Figure 1 and 4            |
|------------|------------------------------|---------------|--------------|---------------------------------|
| 1          | :01 E3.CEL                   | GSE30292      | Tumor        | E=tumor cells                   |
| 2          | :02 E8.CEL                   | GSE30292      | Tumor        | E=tumor cells                   |
| 3          | :03 E9.CEL                   | GSE30292      | Tumor        | E=tumor cells                   |
| 4          | :04 N3.CEL                   | GSE30292      | Normal       | N= healthy colonocytes          |
| 5          | :05 N8.CEL                   | GSE30292      | Normal       | N= healthy colonocytes          |
| 6          | :06 N14.CEL                  | GSE30292      | Normal       | N= healthy colonocytes          |
| 7          | :07 CAF8.CEL                 | GSE30292      | CAF          | F=cancer-associated fibroblasts |
| 8          | :08 CAF14.CEL                | GSE30292      | CAF          | F=cancer-associated fibroblasts |
| 9          | :09 CAF17.CEL                | GSE30292      | CAF          | F=cancer-associated fibroblasts |
| 10         | :10 IL_Biopredict.CEL        | GSE30292      | IL           | I=small intestinal enterocytes  |
| 11         | :11 IL PAT31.CEL             | GSE30292      | IL           | I=small intestinal enterocytes  |
| 12         | :12 IL_Spain.CEL             | GSE30292      | IL           | I=small intestinal enterocytes  |
| 13         | :13 JE PAT25.CEL             | GSE30292      | JE           | I=small intestinal enterocytes  |
| 14         | :14 JE PAT26.CEL             | GSE30292      | JE           | I=small intestinal enterocytes  |
| 15         | :15 Caco2.CEL                | GSE30292      | Caco.FLD     | Caco-2=C (differentiated)       |
| 16         | :16 Caco2.CEL                | GSE30292      | Caco.FLD     | Caco-2=C (differentiated)       |
| 17         | :17 Caco2.CEL                | GSE30292      | Caco.FLD     | Caco-2=C (differentiated)       |
| 18         | :18 HT29.CEL                 | GSE30292      | HT29.D       | HT29=H (differentiated)         |
| 19         | :19 HT29.CEL                 | GSE30292      | HT29.D       | HT29=H (differentiated)         |
| 20         | :20 HT29.CEL                 | GSE30292      | HT29.D       | HT29=H (differentiated)         |
| 21         | :21 T84.CEL                  | GSE30292      | T84          | T84=T                           |
| 22         | :22 T84.CEL                  | GSE30292      | T84          | T84=T                           |
| 23         | :23 T84.CEL                  | GSE30292      | T84          | T84=T                           |
| 24         | :24 SW480.CEL                | GSE30292      | SW480        | SW480=S                         |
| 25         | :25 SW480.CEL                | GSE30292      | SW480        | SW480=S                         |
| 26         | :26 SW480.CEL                | GSE30292      | SW480        | SW480=S                         |
| 27         | :27 LS174T.CEL               | GSE30292      | LS174T       | LS174T=L                        |
| 28         | :28 LS174T.CEL               | GSE30292      | LS174T       | LS174T=L                        |
| 29         | :29 LS174T.CEL               | GSE30292      | LS174T       | LS174T=L                        |
| 30         | :44 HCT116 GSM274713.CEL     | GSE10843      | HCT116       | HCT116=6                        |
| 31         | :45 HCT116 GSM274714.CEL     | GSE10843      | HCT116       | HCT116=6                        |
| 32         | :46 HCT116 GSM274726.CEL     | GSE10843      | HCT116       | HCT116=6                        |
| 33         | :47 Colo205 GSM274717.CEL    | GSE10843      | COLO205      | COLO205=O                       |
| 34         | :48 Colo205 GSM274718.CEL    | GSE10843      | COLO205      | COLO205=O                       |
| 35         | :49 Colo205 GSM274728.CEL    | GSE10843      | COLO205      | COLO205=O                       |
| 36         | :50 Caco2 GSM274711.CEL      | GSE10843      | Caco.FLU     | G=Caco-2 (undifferentiated)     |
| 37         | :51 Caco2 GSM274712.CEL      | GSE10843      | Caco.FLU     | G=Caco-2 (undifferentiated)     |
| 38         | :52 Caco2 GSM274725.CEL      | GSE10843      | Caco.FLU     | G=Caco-2 (undifferentiated)     |
| 39         | :53 HCT15 GSM274763.CEL      | GSE10843      | HCT15        | HCT15=5                         |
| 40         | :54 HCT15 GSM274764.CEL      | GSE10843      | HCT15        | HCT15=5                         |
| 41         | :55 SW620 GSM274773.CEL      | GSE10843      | SW620        | SW620=W                         |
| 42         | :56 SW620 GSM274774.CEL      | GSE10843      | SW620        | SW620=W                         |
| 43         | :57 MB231 GSM276040.CEL      | GSE10890      | MB231        | MB231=M                         |
| 44         | :58 MB231 GSM276041.CEL      | GSE10890      | MB231        | MB231=M                         |
| 45         | :59 MB231 GSM276042.CEL      | GSE10890      | MB231        | MB231=M                         |
| 46         | :60 MCF7 GSM276049.CEL       | GSE10890      | MCF7         | MCF7=7                          |
| 47         | :61 MCF7 GSM276050.CEL       | GSE10890      | MCF7         | MCF7=7                          |
| 48         | :62 MCF7 GSM276051.CEL       | GSE10890      | MCF7         | MCF7=7                          |
| 49         | :63 cacoF.CEL                | GSE30292      | Caco.Fi.D    |                                 |
| 50         | :64 cacoF.CEL                | GSE30292      | Caco.Fi.D    |                                 |
| 51         | :65 cacoF.CEL                | GSE30292      | Caco.Fi.D    |                                 |
| 52         | :66 caco JU.CEL              | GSE30292      |              |                                 |
| 53         | :67 caco JD.CEL              | GSE30292      |              |                                 |
| 54         | :68 cacoB.CEL                | GSE30292      |              |                                 |
| 55         | :69 cacoB.CEL                | GSE30292      |              |                                 |
| 56         | :70 cacoB.CEL                | GSE30292      |              |                                 |
| 57         | :71 cacoR.CEL                | GSE30292      | CacoReady    |                                 |
| 58         | :72 cacoR.CEL                | GSE30292      | CacoReady    |                                 |
| 59         | :73 cacoR.CEL                | GSE30292      | CacoReady    |                                 |
| 60         | :74 HT29 GSM327229.CEL       | GSE13059      | HT29.U       | HT29=9                          |
| 61         | :75 HT29 GSM327230.CEL       | GSE13059      | HT29.U       | HT29=9                          |
| 62         | :76 HT29 GSM327231.CEL       | GSE13059      | HT29.U       | HT29=9                          |
| 63         | :77 CacoP2 GSM402370.CEL     | GSE16648      | Caco.S       |                                 |
| 64         | :78 CacoP2 GSM402373.CEL     | GSE16648      | Caco.S       |                                 |
| 65         | :79 CacoP2 GSM402375.CEL     | GSE16648      | Caco.S       |                                 |
| 66         | :80 Lovo GSM274719.CEL       | GSE10843      | LOVO         | LOVO=V                          |
| 67         | :81 Lovo GSM274720.CEL       | GSE10843      | LOVO         | LOVO=V                          |
| 68         | :82 Lovo GSM274729.CEL       | GSE10843      | LOVO         | LOVO=V                          |
| 69         | :83 HT29 GSM288491.CEL       | GSE16648      | HT29.S       |                                 |
| 70         | :84 HT29 GSM288497.CEL       | GSE16648      | HT29.S       |                                 |
| 71         | :85 HT29 GSM288499.CEL       | GSE16648      | HT29.S       |                                 |
| 72         | :86 HT29 GSM288501.CEL       | GSE16648      | HT29.R       |                                 |
| 73         | :87 HT29 GSM288502.CEL       | GSE16648      | HT29.R       |                                 |
| 74         | :88 HT29 GSM288536.CEL       | GSE16648      | HT29.R       |                                 |
| 75         | :89 Caco2 GSM402378.CEL      | GSE16648      | Caco.R       |                                 |
| 76         | :90 Caco2 GSM402380.CEL      | GSE16648      | Caco.R       |                                 |
| 77         | :91 Caco2 GSM402383.CEL      | GSE16648      | Caco.R       |                                 |
| 78         | :92 COLO320DM GSM274777.CEL  | GSE10843      | COLO320      | COLO320=3                       |
| 79         | :93 COLO320HSR GSM274778.CEL | GSE10843      | COLO320      | COLO320=3                       |
| 80         | :94 KM12 GSM274781.CEL       | GSE10843      | KM12         | KM12=K                          |
| 81         | :95 CDX22 GSM564445.CEL      | GSE22572      | Caco CDX2.D  |                                 |
| 82         | :96 CDX22B GSM564448.CEL     | GSE22572      | Caco CDX2.D  |                                 |
| 83         | :97 CDX24 GSM564446.CEL      | GSE22572      | Caco CDX2.D  |                                 |
| 84         | :98 GFP1 GSM564444.CEL       | GSE22572      |              |                                 |
| 85         | :99 GFP2 GSM564447.CEL       | GSE22572      |              |                                 |
| 86         | :N01 CacoCDX21.CEL           | GSE30292      | Caco CDX2.U  |                                 |
| 87         | :N02 CacoCDX22.CEL           | GSE30292      | Caco CDX2.U  |                                 |
| 88         | :N03 CacoGFP.CEL             | GSE30292      |              |                                 |
| 89         | :N04 DLD1 GSM274715.CEL      | GSE10843      | DLD1         | DLD1=D                          |
| 90         | :N05 DLD1 GSM274716.CEL      | GSE10843      | DLD1         | DLD1=D                          |
| 91         | :N06 DLD1 GSM274727.CEL      | GSE10843      | DLD1         | DLD1=D                          |
